# Supplementary material for: Conformational behavior and self-assembly of disjoint semi-flexible ring polymers adsorbed on solid substrates
Source: Royal Society of Chemistry journal article supplement (doi:10.1039/d1sm00500f), 2021-01-01
Supplement: d1sm00500f1.pdf [file d1sm00500f1.pdf]

## Supplementary Material: Conformational Behavior and Self-Assembly of Disjoint Semi-Flexible Ring Polymers Adsorbed on Solid Substrates

Yu Zhu,<sup>1</sup> P.B. Sunil Kumar,<sup>2</sup> and Mohamed Laradji<sup>1</sup>

<sup>1</sup>Department of Physics and Materials Science, The University of Memphis, Memphis, TN 38152, USA

<sup>2</sup>Department of Physics, Indian Institute of Technology Palakkad, Palakkad-668557, Kerala, India

### Overlap Density

Since in the present article, we frequently refer to the overlap density, we provide in this supplementary a rationale and values of the overlap density,  $\rho^*$  in the case of uniform substrates. In the case of polymer chains, the overlap density in two dimensions is typically defined as  $\rho^* \approx 1/R_g^2$ , where  $R_g$  is the radius of gyration of the polymer in the dilute regime. However, since  $R_g$  is smaller than the real size of the molecule, we use a more accurate definition of the size of the ring polymer defined as the ensemble average of the maximum distance between monomers of a ring polymer and its center of mass in the dilute regime. This length scale,  $R_{max}$  is proportional to the radius of gyration of the polymer. The overlap density, defined as  $\rho^* \approx 1/R_{max}^2$  is shown versus the bending rigidity of the polymers,  $\kappa$ , in Fig. S1. This figure shows that the overlap density decreases with increasing  $\kappa$  up to about  $\kappa \approx 5k_B T$ , which is inline with the fact that the degree of anisotropy of the polymers increases with  $\kappa$  (i.e., a decrease in  $\Sigma$ ) for low values of  $\kappa$  as shown by Fig. 3. However, for  $\kappa \gtrsim 5k_B T$ ,  $\rho^*$  weakly increases with  $\kappa$ , which is also inline with the decrease in the degree of anisotropy (or increases in  $\Sigma$ ) for large values of  $\kappa$  as shown by Fig. 3.

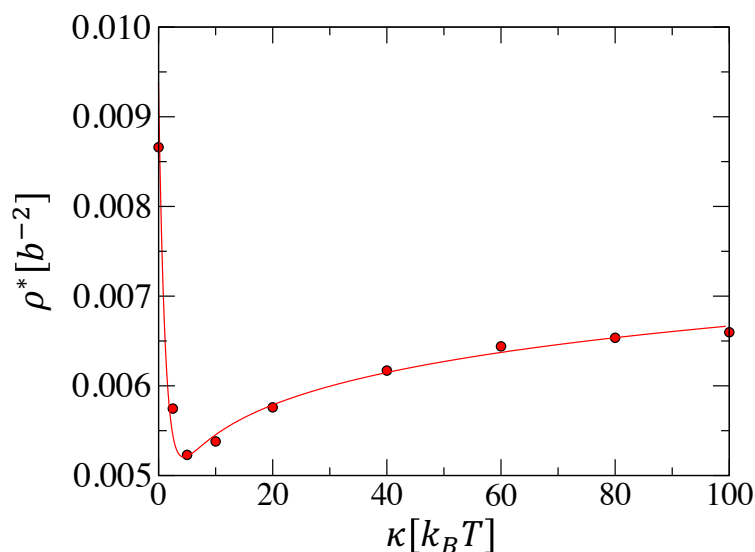

Figure S1: Solid circles correspond to the overlap density of the ring polymers versus their bending rigidity in the case of a uniform substrate. The solid line is a guide to the eye.

### Curvature Distribution

Fig. S2 shows the distribution of the local curvature,  $D(c)$  for the case of  $\kappa = 100k_B T$  at different densities. Notice that the peak is at a finite value of  $c$  for densities lower than  $0.01b^{-2}$ . However, for densities higher than  $0.01b^{-2}$ , the peak shifts to  $c \approx 0$ , and a shoulder emergence at large positive values of  $c$ . The change in the shape of the distribution is correlated with the change of the morphology of the polymers from mainly obround to biconcave.

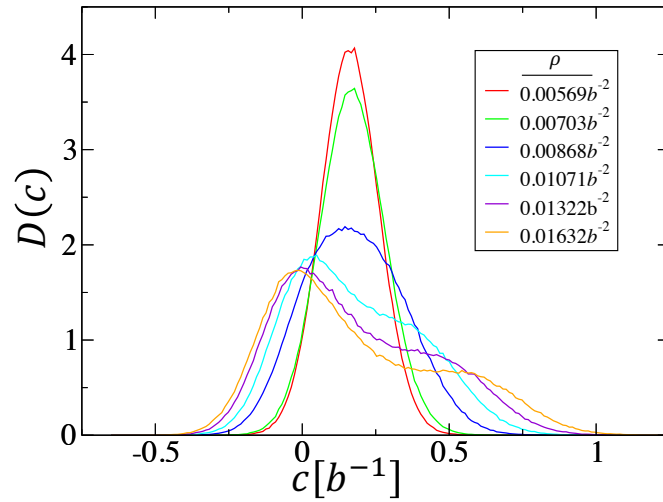

Figure S2: Normalized curvature distribution for the case of  $\kappa = 100k_B T$ . Data correspond to different densities shown in the legend. Notice the emergence of a shoulder at high curvatures for  $\rho > 0.01b^{-2}$  and a shift of the main peak's position to the left as  $\rho$  is increased.

### Positional and Nematic Correlations

Fig. S3 depicts the positional pair correlation, calculated using Eq. (13) of the main text, in the case of low bending rigidity ( $\kappa = 5k_B T$ ) and high bending rigidity ( $\kappa = 80k_B T$ ).

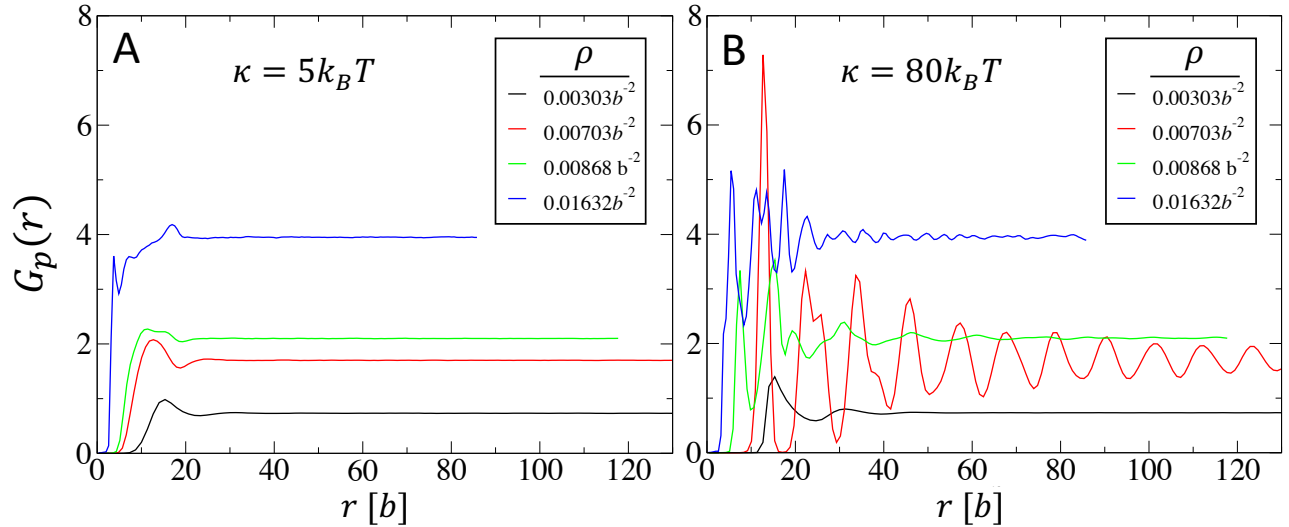

Figure S3: Positional correlation function  $G_p(r)$  versus  $r$  for different values of the density. (A) and (B) corresponds to  $\kappa = 5k_B T$  and  $80k_B T$ , respectively.

Fig. S4 depicts the orientational pair correlations in the case of low bending rigidity ( $\kappa = 5k_B T$ ) and high bending rigidity ( $\kappa = 80k_B T$ ). The orientational pair correlations is calculated using

$$G_n(r) = \left\langle \cos 2 [\theta(\mathbf{R}_k) - \theta(\mathbf{R}_l)] \delta(\mathbf{r} - \mathbf{R}_{kl}) \right\rangle, \quad (1)$$

where  $\mathbf{R}_k$  and  $\mathbf{R}_l$  are the coordinates of the centers of mass of polymers  $k$  and  $l$ , and  $\theta(\mathbf{R}_k)$  is the angle between the director of polymer  $k$  and an arbitrary fixed axis.

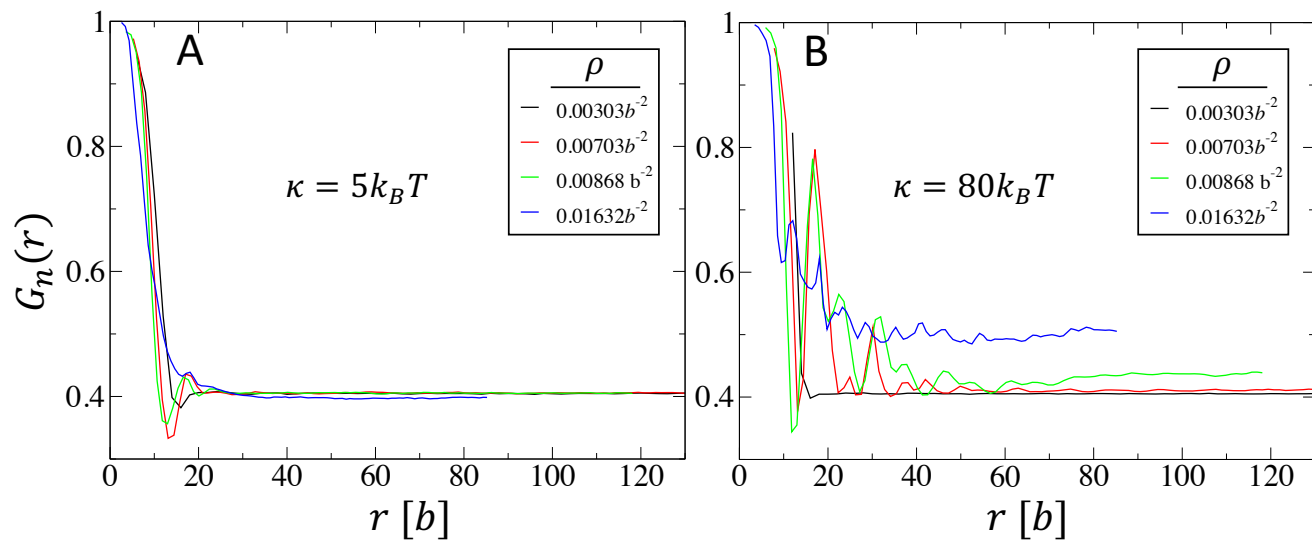

Figure S4: Nematic correlation function  $G_n(r)$  versus  $r$  for different values of the density. (A) and (B) corresponds to  $\kappa = 5k_B T$  and  $80k_B T$ , respectively.
